# Supplementary material for: β-Cyclodextrin-Immobilized Ni/Graphene Electrode for Electrochemical Enantiorecognition of Phenylalanine
Source: PubMed Central journal article supplement (PMC7040631; doi:10.3390/ma13030777), 2020-02-08
Supplement: materials-13-00777-s001.pdf [file materials-13-00777-s001.pdf]

Supplementary Materials

# $\beta$ -Cyclodextrin-Immobilized Ni/Graphene Electrode for Electrochemical Enantiorecognition of Phenylalanine

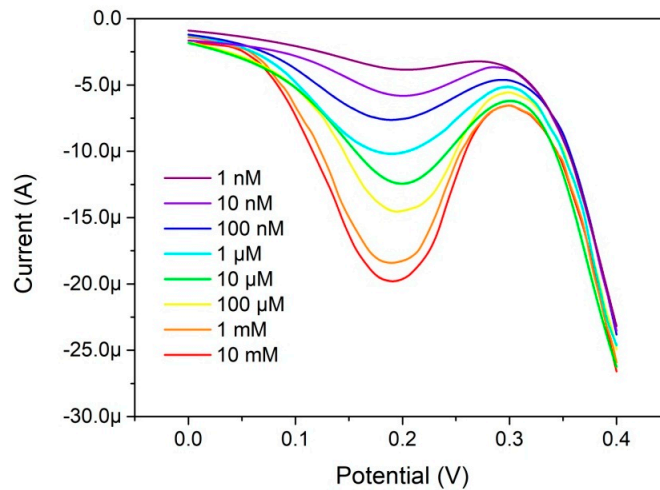

Figure S1. DPV curves of different concentrations of L-phenylalanine.

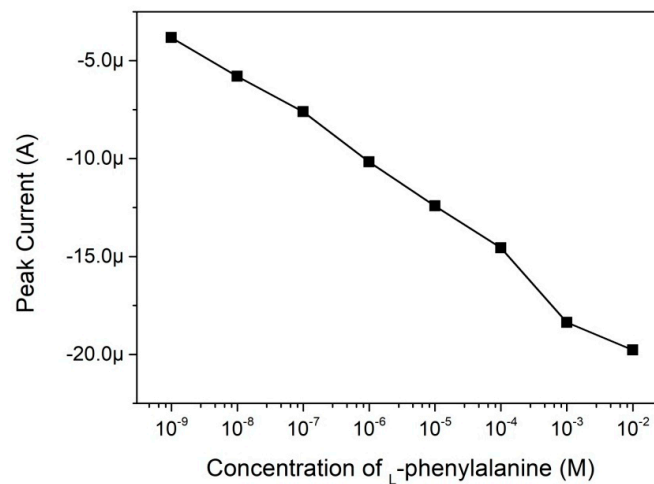

Figure S2. The peak current as a function of added concentrations of L-phenylalanine.

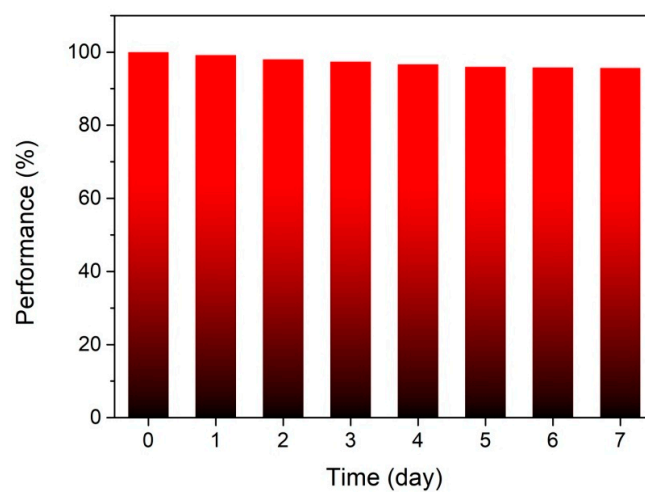

**Figure S3.** The change of electrode performance during long-term storage.

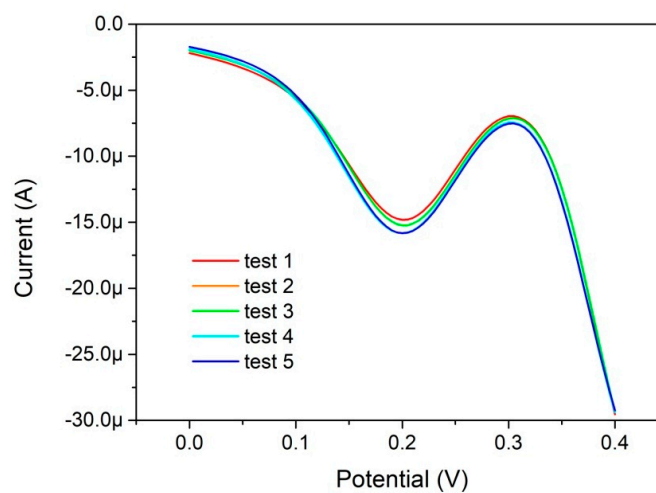

**Figure S4.** DPV curves of repeated experiments with an L-phenylalanine concentration of 0.1 mM.

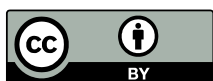

© 2020 by the authors. Submitted for possible open access publication under the terms and conditions of the Creative Commons Attribution (CC BY) license (<http://creativecommons.org/licenses/by/4.0/>).
